# Supplementary material
Source: PubMed Central journal article supplement (PMC4415461)

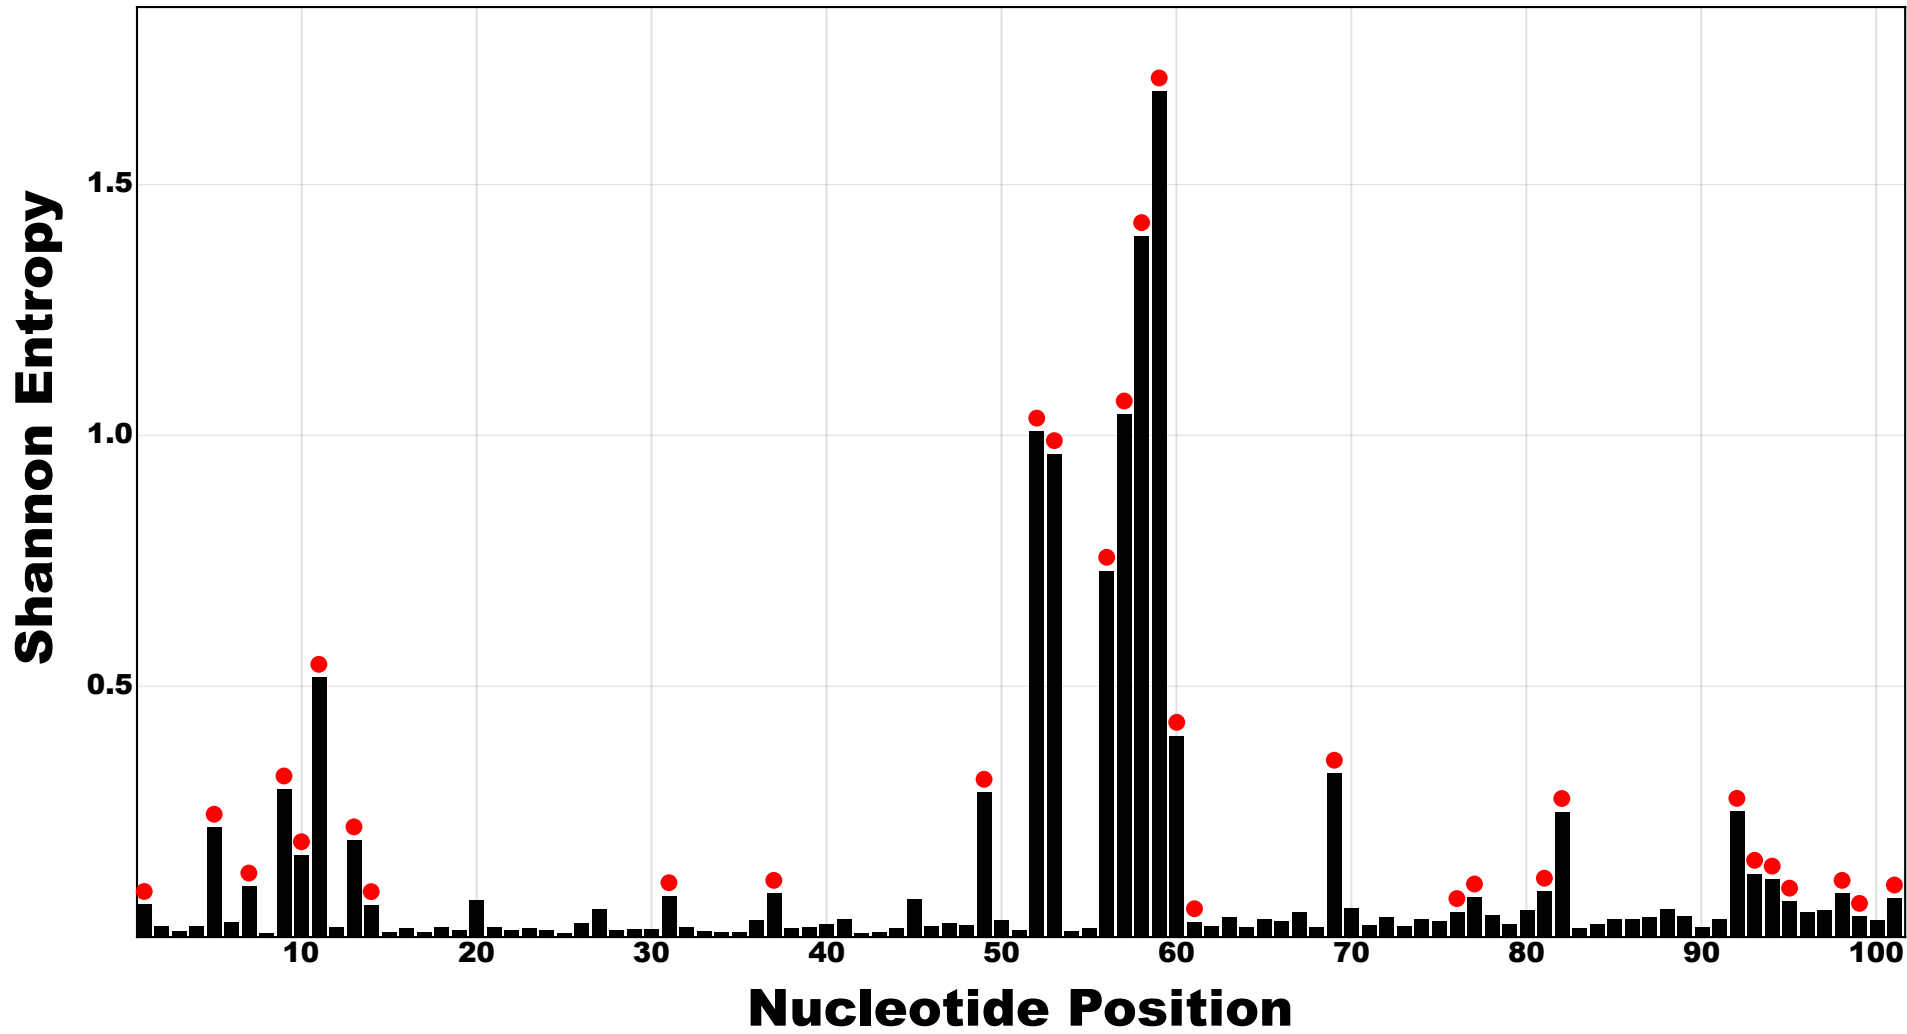

Supplement: mee30004-1111-sd1.pdf [file mee30004-1111-sd1.pdf]

**LfSe biomarkers**

**OTUs** **Oligotypes**

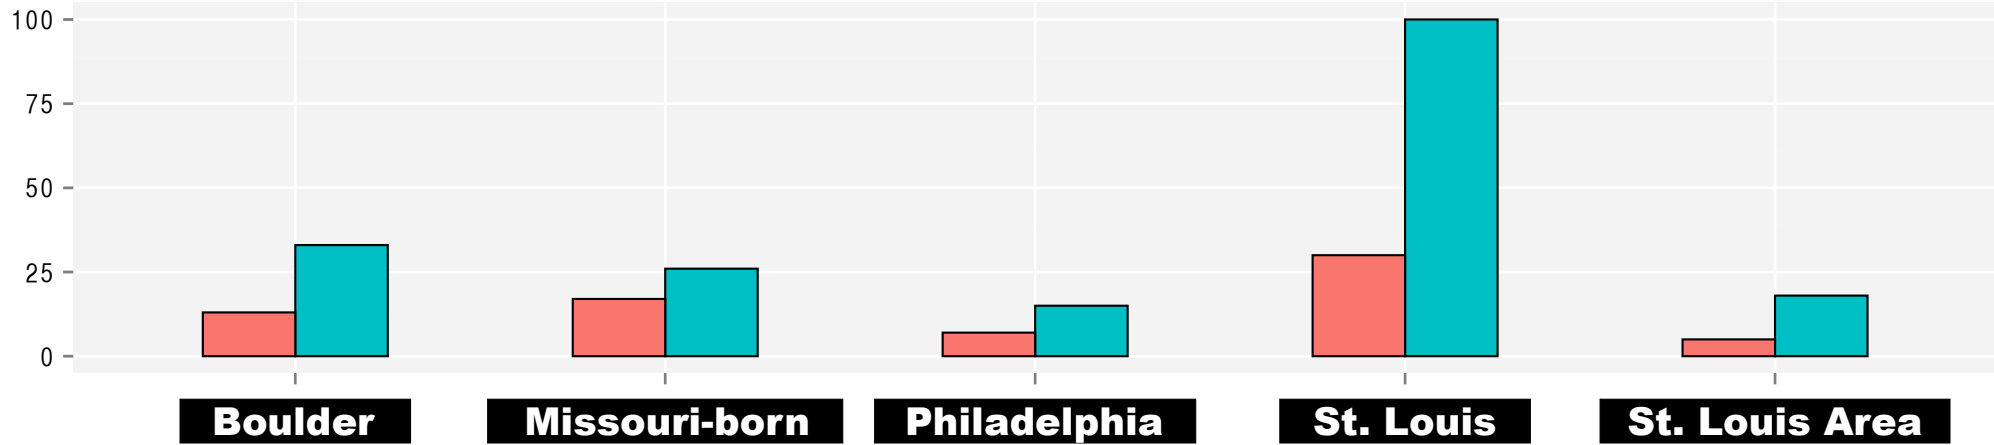

**Effect Size**

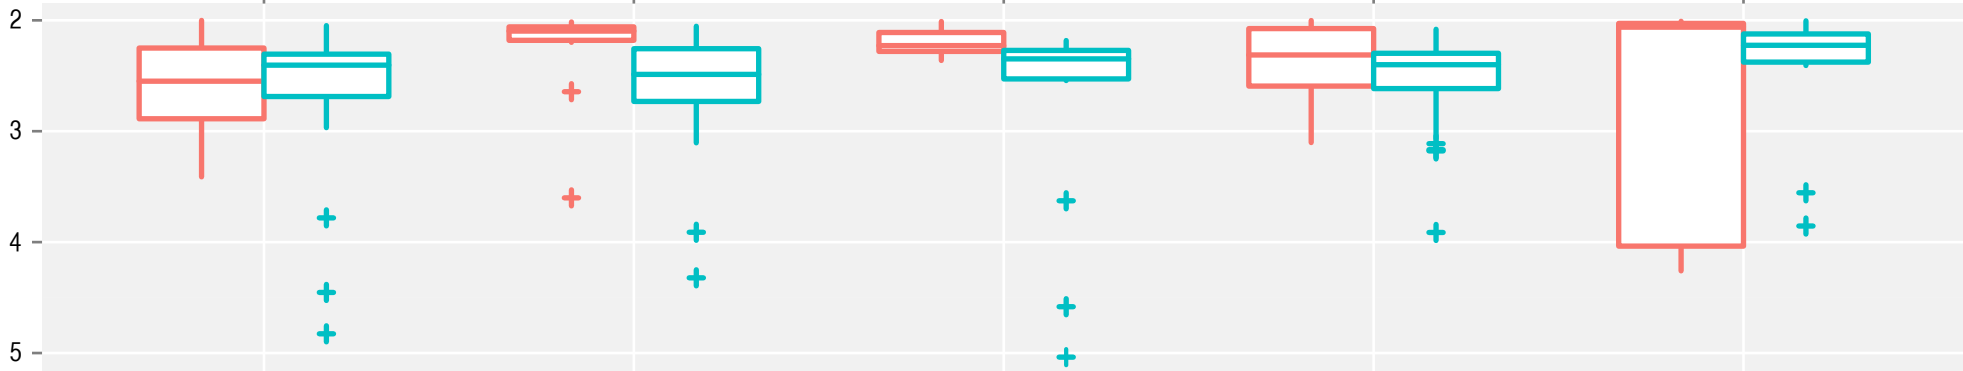

Supplement: mee30004-1111-sd3.pdf [file mee30004-1111-sd3.pdf]
